# Supplementary material for: Socioeconomic inequalities in health behaviours pre- and post-COVID-19 among Japanese adolescents: a three-wave repeated cross-sectional survey
Source: Research Square preprint supplement (doi:10.21203/rs.3.rs-5854454/v1), 2025-03-12
Supplement: Supplementary file 1 [file 04a360d6d341416cea9505d9.docx]

Appendix

| e-Table. Missing number and percentage of each variable each survey year. | | | | | | | | |
| --- | --- | --- | --- | --- | --- | --- | --- | --- |
|  | 2019 (N = 1076) | |  | 2021 (N = 1025) | |  | 2023 (N=898) | |
|  | n | % |  | n | % |  | n | % |
| sex | 0 | 0.0 |  | 0 | 0.0 |  | 0 | 0.0 |
| age | 0 | 0.0 |  | 0 | 0.0 |  | 0 | 0.0 |
| Residence area | 0 | 0.0 |  | 0 | 0.0 |  | 0 | 0.0 |
| Household income | 239 | 22.2 |  | 232 | 22.6 |  | 232 | 25.8 |
| Family structure | 0 | 0.0 |  | 0 | 0.0 |  | 0 | 0.0 |
| Sports participants | 3 | 0.3 |  | 6 | 0.6 |  | 17 | 1.9 |
| Self-rated health | 4 | 0.4 |  | 3 | 0.3 |  | 6 | 0.7 |
| Preference of physical activity | 5 | 0.5 |  | 4 | 0.4 |  | 9 | 1.0 |
| MVPA | 5 | 0.5 |  | 3 | 0.3 |  | 0 | 0.0 |
| Screen time | 76 | 7.1 |  | 78 | 7.6 |  | 61 | 6.8 |
| Sleep | 10 | 0.9 |  | 7 | 0.7 |  | 7 | 0.8 |
| Breakfast | 1 | 0.1 |  | 3 | 0.3 |  | 5 | 0.6 |
| Bowel movement | 8 | 0.7 |  | 5 | 0.5 |  | 4 | 0.4 |
| *MVPA* moderate-to-vigorous physical activity | | | | | | | | |
